# Supplementary material for: Modification of multiwalled carbon nanotubes with a ruthenium drug candidate—indazolium[tetrachlorobis(1H-indazole)ruthenate(iii)] (KP1019 )
Source: Royal Society of Chemistry journal article supplement (doi:10.1039/d0dt03528a), 2020-01-01

Modification of multiwall carbon nanotubes with ruthenium drug candidate -  
indazolium [tetrachlorobis(1H-indazole)ruthenate(III)] (KP1019)

Monika Richert,<sup>\*a</sup> Grzegorz Trykowski,<sup>b</sup> Mariusz Walczyk,<sup>b</sup> Marcin J. Cieślak,<sup>c</sup> Julia  
Każmierczak-Barańska,<sup>c</sup> Karolina Królewska-Golińska,<sup>c</sup> Janusz W. Sobczak,<sup>d</sup> Stanisław  
Biniak<sup>b</sup>

*<sup>a</sup> Faculty of Pharmacy, Collegium Medicum in Bydgoszcz, Nicolaus Copernicus University in  
Toruń; Jurasza 2; 85-094 Bydgoszcz, Poland;*

*E-mail: [monika.richert@cm.umk.pl](mailto:monika.richert@cm.umk.pl), phone: +48 52 585-38-03, Fax: +48 52 585-38-04*

*<sup>b</sup> Faculty of Chemistry, Nicolaus Copernicus University in Toruń; Gagarina 7, 87-100 Toruń,  
Poland*

*<sup>c</sup> Centre of Molecular and Macromolecular Studies, Polish Academy of Sciences,  
Sienkiewicza 112, 90-363 Łódź, Poland*

*<sup>d</sup> Institute of Physical Chemistry Polish Academy of Sciences Laboratory for Surface  
Analysis, Kasprzaka 44-52, 01-224 Warsaw, Poland*

Corresponding Authors

\*e-mail: [monika.richert@cm.umk.pl](mailto:monika.richert@cm.umk.pl)

KEYWORDS: *[IndH][trans-RuCl<sub>4</sub>(Ind)<sub>2</sub>], carbon nanotubes, anticancer, drug delivery  
system, carbon nanotubes functionalization*

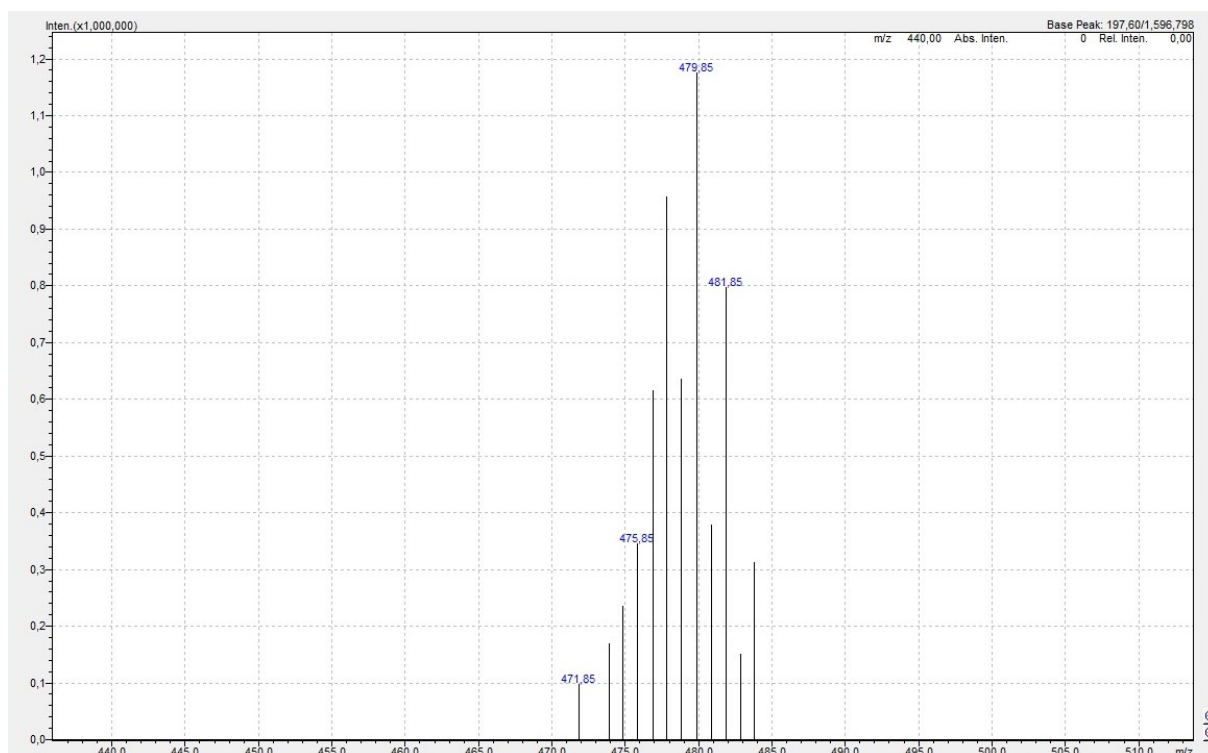

Figure S1. Negative ion ESI mass spectra of  $[\text{RuCl}_4(\text{In})_2]^-$  ( $m/z$  479.85) for filtrate of MWCNTs-Ru (3).

### Crystallographic parameters for ruthenium

Crystal system: Hexagonal  
 Space group: P63/mmc  
 Space group number: 194

a (Å): 2.7058  
 b (Å): 2.7058  
 c (Å): 4.2819  
 Alpha (°): 90.0000  
 Beta (°): 90.0000  
 Gamma (°): 120.0000

Calculated density ( $\text{g}/\text{cm}^3$ ): 12.44  
 Measured density ( $\text{g}/\text{cm}^3$ ): 12.20  
 Volume of cell ( $10^6 \text{ pm}^3$ ): 27.15  
 Z: 2.00

### References

Primary reference: *Natl. Bur. Stand. (U.S.), Circ. 539, IV, 5, (1955)*  
 Powder data: *Am. Mineral., 61, 177, (1976)*

## Peak list

| No. | h | k | l | d [Å]   | 2Theta[deg] | I [%] |
|-----|---|---|---|---------|-------------|-------|
| 1   | 1 | 0 | 0 | 2.34300 | 38.388      | 40.0  |
| 2   | 0 | 0 | 2 | 2.14200 | 42.153      | 35.0  |
| 3   | 1 | 0 | 1 | 2.05600 | 44.007      | 100.0 |
| 4   | 1 | 0 | 2 | 1.58080 | 58.325      | 25.0  |
| 5   | 1 | 1 | 0 | 1.35300 | 69.407      | 25.0  |
| 6   | 1 | 0 | 3 | 1.21890 | 78.390      | 25.0  |
| 7   | 2 | 0 | 0 | 1.17150 | 82.224      | 6.0   |
| 8   | 1 | 1 | 2 | 1.14340 | 84.705      | 25.0  |
| 9   | 2 | 0 | 1 | 1.12990 | 85.960      | 20.0  |
| 10  | 0 | 0 | 4 | 1.07050 | 92.038      | 4.0   |
| 11  | 2 | 0 | 2 | 1.02780 | 97.088      | 8.0   |
| 12  | 1 | 0 | 4 | 0.97380 | 104.563     | 6.0   |
| 13  | 2 | 0 | 3 | 0.90560 | 116.553     | 16.0  |
| 14  | 2 | 1 | 0 | 0.88570 | 120.849     | 6.0   |
| 15  | 2 | 1 | 1 | 0.86730 | 125.286     | 25.0  |
| 16  | 1 | 1 | 4 | 0.83950 | 133.147     | 18.0  |
| 17  | 2 | 1 | 2 | 0.81850 | 140.478     | 10.0  |
| 18  | 1 | 0 | 5 | 0.80430 | 146.562     | 16.0  |

## Stick Pattern

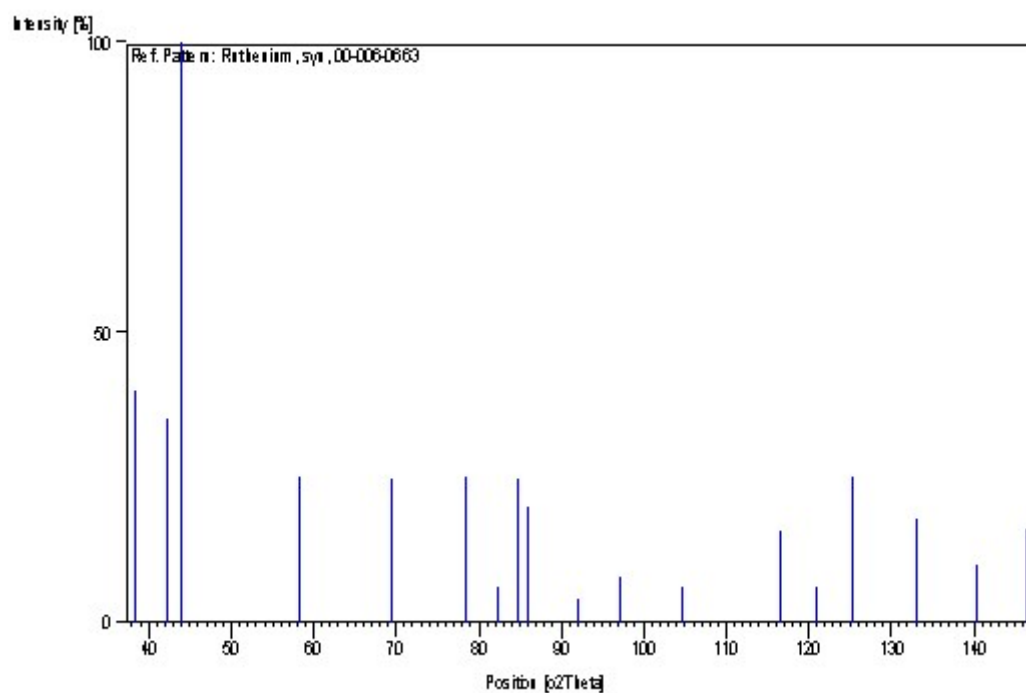

Supplement: d0dt03528a1.pdf [file d0dt03528a1.pdf]
